# Supplementary material
Source: Springer Nature journal article supplement (https://www.springermedizin.de/resource/supplementary/12875_2012_775_MOESM3_ESM.pdf/9435128)
Supplement: MOESM3 [file 9435128]

**Telephone**

- Contact patient at agreed date and time
- Check whether each health plan action is complete

**If yes**

- Assess whether future action required
- Record future actions and review date
- Type up new health plan and send to patient

**If no**

- Discuss reasons and obstacles
- Agree and record future actions
- Agree and record review date
- Type up new health plan and send to patient

**If patient has goals/action plan**

- Enquire about progress

**If successful**

- Congratulate
- Discuss reasons for success
- Ask if they want to continue with current goals or set new goals

**If unsuccessful**

- Take joint responsibility for setting a goal which was too difficult
- Discuss difficulties
- Praise small successes

**Continue with current goal/plan**

- Set date and time for review

**Set new goal/s**

- Continue with case management from goal setting

**Review**

- Continue with process
- Review weekly increasing time between contacts as needed
